# Supplementary material for: Additive manufacturing of hollow connected networks for solar photo-Fenton-like catalysis
Source: Royal Society of Chemistry journal article supplement (doi:10.1039/d4su00312h), 2024-01-01
Supplement: d4su00312h1.pdf [file d4su00312h1.pdf]

# **Additive Manufacturing of Hollow Connected Networks for Solar Photo-Fenton-Like Catalysis**

Miguel Ángel Gracia-Pinilla<sup>1,2,#,\*</sup>, Norma Alicia Ramos-Delgado<sup>1,3,#,\*</sup>, Cristian Rosero-Arias<sup>1,4</sup>, Remco Sanders<sup>1</sup>, Stephan Bartling<sup>5</sup>, Jędrzej Winczewski<sup>1</sup>, Han Gardeniers<sup>1</sup>, Arturo Susarrey-Arce<sup>1,\*</sup>

<sup>1</sup>Mesoscale Chemical Systems, MESA<sup>+</sup> Institute, University of Twente, PO Box 217, Enschede 7500 AE, the Netherlands

<sup>2</sup>Facultad de Ciencias Físico Matemáticas, Universidad Autónoma de Nuevo León, San Nicolás de los Garza, Nuevo León 66455, Mexico

<sup>3</sup>Centro de Investigación e Innovación Tecnológica, Cátedras CONACyT-Tecnológico Nacional de México/I.T. Nuevo León, Apodaca, Nuevo León, México

<sup>4</sup>School of Engineering and Sciences, Tecnológico de Monterrey, Eugenio Garza Sada 2501, Monterrey 64849, NL, Mexico

<sup>5</sup>Leibniz-Institut für Katalyse e.V., Albert-Einstein-Strasse 29 a, D-18059 Rostock, Germany

#These authors contributed equally.

## 1. Complimentary Scanning Electron Microscopy (SEM) images

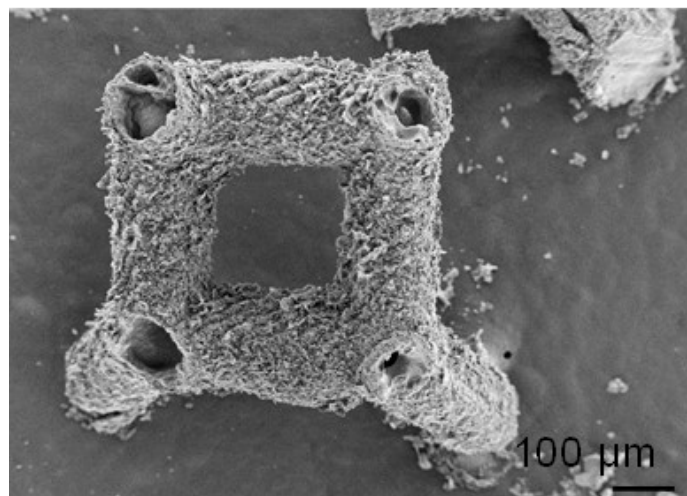

**Figure S1.** SEM image of broken 3DHMs composed of  $\text{Al}_2\text{O}_3$  NPs.

SEM image of  $\text{Al}_2\text{O}_3$  3D ceramic hollow microarchitecture printed using Phrozen aqua grey 4K photoresin is shown in **Figure S1**. Similar to  $\text{TiO}_2$  3DHMs,  $\text{SiO}_2$  has been found.  $\text{SiO}_2$  traces are from the Phrozen aqua grey 4K resin.

## 2. Thermogravimetric analysis (TGA)

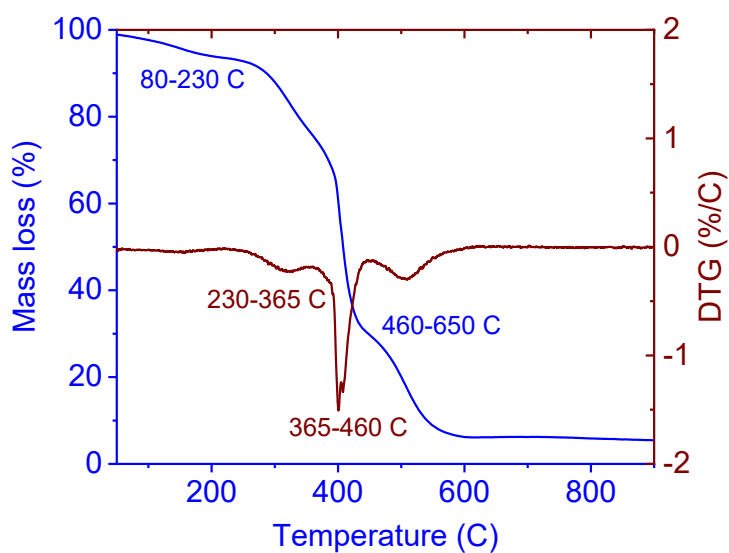

**Figure S2.** TGA of the  $\text{TiO}_2$  3D hollow microarchitectures.

TGA analysis results present the mass losses (Mass loss % in blue), and differential thermogravimetric analysis (DTG %/C in magenta) shows four regions. Low-temperature region (80-230 °C) can be related to a low-temperature debinding stage. This could be related to solvents and small molecules that decompose within the low-temperature range. Diluent monomers and acrylic polymers might gasify. Within the same temperature range, the melted binder might achieve some fluidity. The process can be even more pronounced at higher temperatures (230-365 °C). At the higher temperature, close to 365 °C, decomposition of the printed structure, leading to carbon-like species, is achieved. More prominently, a mass loss in **Figure S2** is achieved around 365-460 C. The results align well with the size reduction of the 3D-printed microarchitecture (**Figure 1**). At higher temperatures (460-650 °C), the remaining carbon of the printed structure reacts to oxidized gaseous products to form hollow interconnected channels. At the high-temperature end (650 °C), most of the carbon-like remaining residues undergo intense calcination, creating the 3D printing hollow microarchitecture (**Figure 1**).

### 3. Complimentary X-ray photoelectron spectroscopy (XPS) data

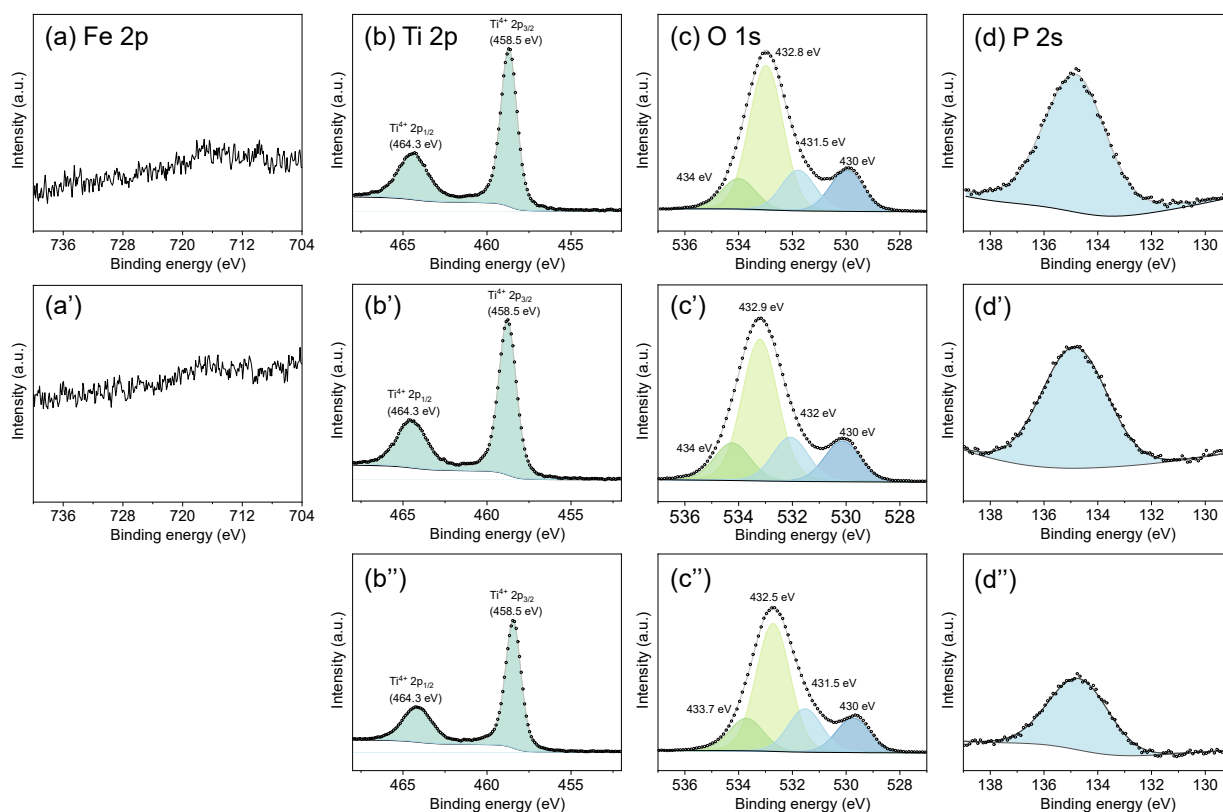

**Figure S3.** XPS core spectra for (a, a') Fe 2p, (b, b', b'') Ti 2p, (c, c', c'') O 1s, (d, d', d'') P 2s for (a, b, c, d) TiOFe<sub>2</sub>, (a', b', c', d') TiOFe<sub>0.5</sub>, and (b', c', d'') TiO 3DHMs. Note that Fe 2p for the TiO<sub>2</sub> 3DHM is not shown. No indications for Fe have been found in the general survey.

In **Figures 3Sa** and **3Sa'**, no Fe 2p has been resolved from the XPS analysis. The Ti 2p XPS in **Figures 3Sb**, **3Sb'**, and **3Sb''** displays two prominent peaks at 458.5 and 464.3 eV. The peaks are assigned to Ti<sup>4+</sup> from TiO<sub>2</sub>.<sup>[1]</sup> XPS O1s core level spectra exhibit the contribution at ca. ~530 eV attributed to bulk O in  $\alpha$ -TiO<sub>2</sub> (**Figures 3Sc**, **3Sc'**, and **3Sc''**).<sup>[2]</sup> Surface-adsorbed H<sub>2</sub>O and -OH as well as organic carbon contributions, are detected at higher binding energies (531-534 eV).<sup>[2]</sup> Interestingly, the P signature from the BAPO photoinitiator has been found in **Figures 3Sd**, **3Sd'**, and **3Sd''**,

#### 4. Complimentary X-ray Powder Diffraction (XRD) patterns

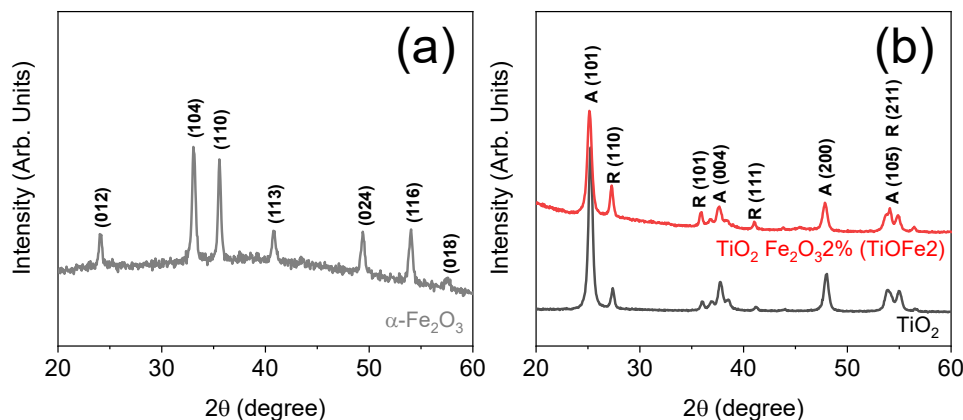

**Figure S4.** XRD of (a)  $\alpha$ -Fe<sub>2</sub>O<sub>3</sub> and (b) commercial TiO<sub>2</sub> and pulverized TiO<sub>2</sub> microarchitectures loaded with TiOFe<sub>2</sub>.

The XRD pattern in **Figure S4a** demonstrates the hematite crystallographic phase ( $\alpha$ -Fe<sub>2</sub>O<sub>3</sub>) after synthesis. The prominent diffraction peaks observed are (012), (104), (110), (113), (024), (116), and (018), which are in agreement with the JCPDS file Card, No. 33-0664. **Figure S4b** reveals the XRD pattern of commercial TiO<sub>2</sub> (black), which is then compared with pulverized printed TiO<sub>2</sub> microarchitecture loaded with 2 wt.%  $\alpha$ -Fe<sub>2</sub>O<sub>3</sub> (red). The results from **Figure S4b** are assigned to the Anatase (A) and Rutile (R) crystallographic phases. The prominent diffraction peaks observed are for Anatase: (101), (004), (200), and (105), while for Rutile: (110), (101), and (111), which are in agreement with the JCPDS file Card, No. 00-021-1272, and JCPDS file Card, No. 01-070-7347. No  $\alpha$ -Fe<sub>2</sub>O<sub>3</sub> has been observed in **Figure S4b**.

## 5. Complimentary Ultraviolet-visible (UV-Vis) analysis

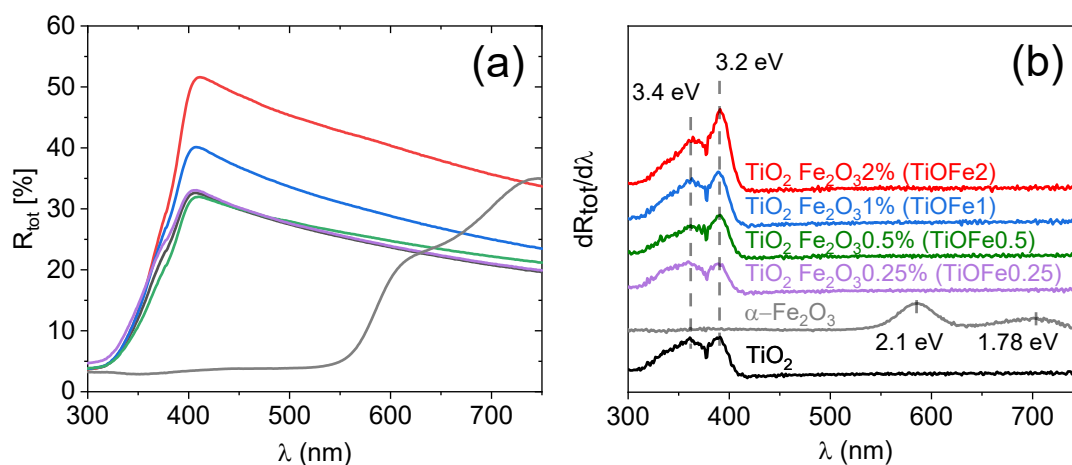

**Figure S5.** (a) spectral dependence of the total optical reflectance  $R_{\text{tot}}$  of TiO<sub>2</sub> microarchitectures loaded with 2 wt.% (red), 1 wt.% (blue), 0.5 wt.% (green), and 0.25 wt.% (violet) of  $\alpha\text{-Fe}_2\text{O}_3$ . (b) first derivate spectra of TiO<sub>2</sub> microarchitectures loaded with 2 wt.% (red), 1 wt.% (blue), 0.5 wt.% (green), and 0.25 wt.% (violet) of  $\alpha\text{-Fe}_2\text{O}_3$ . TiO<sub>2</sub> (black) and  $\alpha\text{-Fe}_2\text{O}_3$  (grey) are used for comparison.

## 6. Energy band diagram

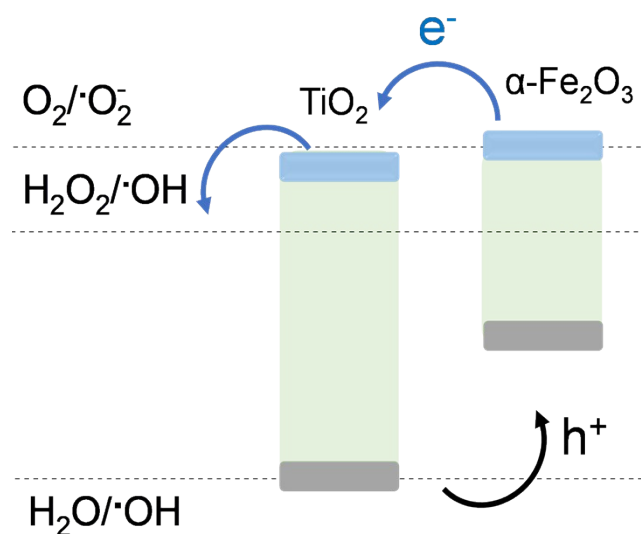

**Figure S6.** Energy band diagrams using the VB and Eg of printed  $\text{TiO}_2$  and synthesized  $\alpha\text{-Fe}_2\text{O}_3$ .

The mechanism is shown in **Figure S7** and suggests photoelectron ( $e^-$ ) generation at the CB and holes ( $h^+$ ) at the VB, aligning with the proposed mechanism in **Figure 5d**.

## 7. Adsorption-degradation synergistic effect

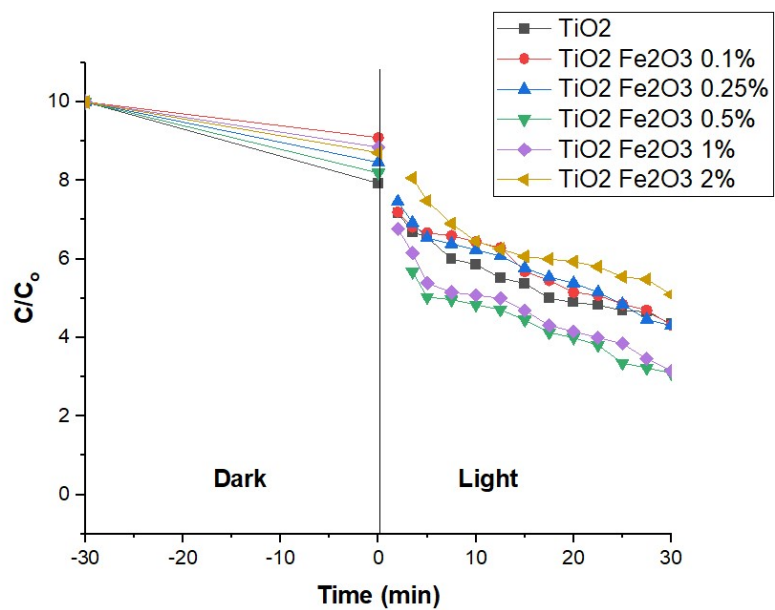

**Figure S7.** MB adsorption-degradation synergistic effect (-30 to 30 minutes) time for 3D microarchitectures composed of TiO<sub>2</sub> and TiO<sub>2</sub> loaded with 2, 1, 0.5, 0.25 wt.% of  $\alpha$ -Fe<sub>2</sub>O<sub>3</sub>.



## 8. Previous work

**Table S1.** Comparative table of 3D printing method and reported MB photodegradation

| 3D Additive Method                                                                | NPs Size (nm) | MB (ppm)  | Photo-degradation (%) / Time (h) | Light Source (W)     | Size 3D (mm)                               | Ref             |
|-----------------------------------------------------------------------------------|---------------|-----------|----------------------------------|----------------------|--------------------------------------------|-----------------|
| 1% TiO <sub>2</sub> /LDPE Floating structures by Fused Filament Fabrication (FFF) | <25           | 10        | 15 / 2 h                         | UV lamp              | Square mesh (25x25x2)                      | [3]             |
| 6% TiO <sub>2</sub> Chitin / Cellulose composites by Printing ink                 | <20           | 50        | 90 / 10 h                        | UV lamp (300)        | Cube (10x10x10)                            | [4]             |
| 20% TiO <sub>2</sub> polystyrene filament by Fused Deposition Modeling (FDM)      | <25           | 20        | 95 / 1h                          | UV lamp (125)        | 16 Cilinders (10x10x10)                    | [5]             |
| 5% TiO <sub>2</sub> / SiO / polymers by Stereolithography (SLA)                   | <25           | 5         | 5 (75 Adsorption x 24 hr) / 8 h  | UV lamp (6)          | hexagonal (5x5x5)                          | [6]             |
| 2% TiO <sub>2</sub> / polyamide by Selective Laser Sintering (SLS)                | <25           | 10        | 65 / 3 h                         | UV lamp (200)        | Lattice structure (54x54x50)               | [7]             |
| 10% TiO <sub>2</sub> / Polyacrylonitrile by Electrospinning                       | <25           | 10        | 55 / 3 h                         | UV Lamp (200)        | Nanofiber (150-400nm)                      | [8]             |
| Nanoparticles                                                                     | <70           | 10        | 70 / 2h                          | Vis Lamp (500)       | Nanoparticles (50-70nm)                    | [9]             |
| <b>4% TiO<sub>2</sub> in commercial resin by Digital Light Processing (DLP)</b>   | <b>&lt;25</b> | <b>10</b> | <b>95 / 3 h</b>                  | <b>UV Led (0.06)</b> | <b>Cube (Truncated Octahedron) (5x5x5)</b> | <b>our work</b> |

## References

- [1] C. Eyovge, C.S. Deenen, F. Ruiz-Zepeda, S. Bartling, Y. Smirnov, M. Morales-Masis, A. Susarrey-Arce, H. Gardeniers, Color Tuning of Electrochromic TiO<sub>2</sub>Nanofibrous Layers Loaded with Metal and Metal Oxide Nanoparticles for Smart Colored Windows, *ACS Appl Nano Mater* 4 (2021) 8600–8610. <https://doi.org/10.1021/acsanm.1c02231>.
- [2] S. Benkoula, O. Sublemontier, M. Patanen, C. Nicolas, F. Sirotti, A. Naitabdi, F. Gaie-Levrel, E. Antonsson, D. Aureau, F.X. Ouf, S.I. Wada, A. Etcheberry, K. Ueda, C. Miron, Water adsorption on TiO<sub>2</sub> surfaces probed by soft X-ray spectroscopies: bulk materials vs. isolated nanoparticles, *Scientific Reports* 2015 5:1 5 (2015) 1–11. <https://doi.org/10.1038/srep15088>.
- [3] M.J. Martín de Vidales, A. Nieto-Márquez, D. Morcuende, E. Atanes, F. Blaya, E. Soriano, F. Fernández-Martínez, 3D printed floating photocatalysts for wastewater treatment, *Catal Today* 328 (2019) 157–163. <https://doi.org/10.1016/j.cattod.2019.01.074>.
- [4] L. Li, J. Li, H. Luo, S. Li, J. Yang, Physicochemical and Photocatalytic Properties of 3D-Printed TiO<sub>2</sub>/Chitin/Cellulose Composite with Ordered Porous Structures, *Polymers (Basel)* 14 (2022). <https://doi.org/10.3390/polym14245435>.
- [5] Z. Viskadourakis, M. Sevastaki, G. Kenanakis, 3D structured nanocomposites by FDM process: a novel approach for large-scale photocatalytic applications, *Appl Phys A Mater Sci Process* 124 (2018) 1–8. <https://doi.org/10.1007/S00339-018-2014-6/METRICS>.
- [6] A. Bansiddhi, G. Panomsuwan, C. Hussakan, T.L. Htet, B. Kandasamy, K. Janbooranapinij, N. Choophun, R. Techapiesancharoenkij, H.R. Pant, W.L. Ang, O. Jongprateep, Ecofriendly 3D Printed TiO<sub>2</sub>/SiO<sub>2</sub>/Polymer Scaffolds for Dye Removal, *Top Catal* 66 (2023) 1662–1673. <https://doi.org/10.1007/s11244-023-01864-x>.
- [7] M. Grandcolas, A. Lind, 3D-printed polyamide structures coated with TiO<sub>2</sub> nanoparticles, towards a 360-degree rotating photocatalytic reactor, *Mater Lett* 307 (2022). <https://doi.org/10.1016/j.matlet.2021.131044>.
- [8] M. Grandcolas, E. Oudin, Enhanced photocatalytic activity of electrospun TiO<sub>2</sub>/polyacrylonitrile membranes in a crossflow reactor using dual lights, *Environ Chem Lett* 21 (2023) 633–638. <https://doi.org/10.1007/s10311-022-01553-3>.
- [9] X. Cao, S. Luo, C. Liu, J. Chen, Synthesis of Bentonite-Supported Fe<sub>2</sub>O<sub>3</sub>-Doped TiO<sub>2</sub> superstructures for highly promoted photocatalytic activity and recyclability, *Advanced Powder Technology* 28 (2017) 993–999. <https://doi.org/10.1016/j.appt.2017.01.003>.
